# Supplementary material for: Anionic metal–organic framework for high-efficiency pollutant removal and selective sensing of Fe(iii) ions
Source: Royal Society of Chemistry journal article supplement (doi:10.1039/c6ra08500h), 2016-01-01
Supplement: c6ra08500h1.pdf [file c6ra08500h1.pdf]

## *Electronic Supplementary Information (ESI)*

# Anionic Metal–Organic Framework for High-Efficiency Pollutant Removal and Selective Sensing of Fe(III) Ions†

Ming-Liang Gao, Na Wei, and Zheng-Bo Han\*

*College of Chemistry, Liaoning University, Shenyang 110036 P.R. China E-mail: ceshzb@lnu.edu.cn*

### Contents

|                                                                                                                                                                                                                                                                                                                                                                                                                                                                   |  |
|-------------------------------------------------------------------------------------------------------------------------------------------------------------------------------------------------------------------------------------------------------------------------------------------------------------------------------------------------------------------------------------------------------------------------------------------------------------------|--|
| <b>Materials and general methods</b> .....                                                                                                                                                                                                                                                                                                                                                                                                                        |  |
| <b>Synthesis of gea-MOF-1</b> .....                                                                                                                                                                                                                                                                                                                                                                                                                               |  |
| <b>Experimental details for Organic dye selective adsorption and separation</b> .....                                                                                                                                                                                                                                                                                                                                                                             |  |
| <b>Table S1</b> Molecular weight and dimensions of different dyes molecules.....                                                                                                                                                                                                                                                                                                                                                                                  |  |
| <b>Table S2</b> The amounts of Y <sup>3+</sup> and Fe <sup>3+</sup> ions in filter cake after washing treatment.....                                                                                                                                                                                                                                                                                                                                              |  |
| <b>Fig. S1</b> Simulated and experimental PXRD patterns for <b>gea-MOF-1</b> .....                                                                                                                                                                                                                                                                                                                                                                                |  |
| <b>Fig. S2</b> UV-vis spectra of DMF solutions of MO <sup>-</sup> in the presence of <b>gea-MOF-1</b> monitored with time...                                                                                                                                                                                                                                                                                                                                      |  |
| <b>Fig. S3</b> UV-vis spectra of DMF solutions of SD <sup>0</sup> in the presence of <b>gea-MOF-1</b> monitored with time....                                                                                                                                                                                                                                                                                                                                     |  |
| <b>Fig. S4</b> UV-vis spectra of DMF solutions of MV <sup>+</sup> in the presence of <b>gea-MOF-1</b> monitored with time...                                                                                                                                                                                                                                                                                                                                      |  |
| <b>Fig. S5</b> Temporal evolution of UV-Vis absorption spectra of MB <sup>+</sup> released from MB <sup>+</sup> @gea-MOF-1 in NaNO <sub>3</sub> -containing DMF solution.....                                                                                                                                                                                                                                                                                     |  |
| <b>Fig. S6</b> PXRD patterns of <b>gea-MOF-1</b> , MB <sup>+</sup> @ <b>gea-MOF-1</b> and MB <sup>+</sup> @ <b>gea-MOF-1</b> after MB <sup>+</sup> .....                                                                                                                                                                                                                                                                                                          |  |
| <b>Fig. S7</b> The reversible adsorption and release of MB <sup>+</sup> in a full ion-exchange and release cycle....                                                                                                                                                                                                                                                                                                                                              |  |
| <b>Fig. S8</b> Excitation (at 284 nm) and emission (at 385 nm) spectra of H <sub>3</sub> BTB in the solid state at room temperature.....                                                                                                                                                                                                                                                                                                                          |  |
| <b>Fig. S9</b> Excitation (at 290 nm) and emission (at 375 nm) spectra of <b>gea-MOF-1</b> in the solid state at room temperature.....                                                                                                                                                                                                                                                                                                                            |  |
| <b>Fig. S10</b> Luminescence emission spectra of the <b>gea-MOF-1</b> in methanol at room temperature in the presence of different equiv of Fe <sup>3+</sup> ions with respect to <b>gea-MOF-1</b> , respectively ( $\lambda_{\text{ex}} = 290 \text{ nm}$ ).....                                                                                                                                                                                                 |  |
| <b>Fig. S11</b> Room-temperature luminescent intensity of <b>gea-MOF-1</b> upon addition of 0.5 equiv of Fe <sup>3+</sup> and 0.4 equiv of various metal ions (a) and with adding 1 equiv of Fe <sup>3+</sup> and 1 equiv of other metal ions (b) in methanol ( $\lambda_{\text{ex}} = 290 \text{ nm}$ ).....                                                                                                                                                     |  |
| <b>Fig. S12</b> Comparison of the photoluminescence intensity of <b>gea-MOF-1</b> in methanol suspension with the introduction of other M <sup>n+</sup> ions (Li <sup>+</sup> , Cd <sup>2+</sup> , Pb <sup>2+</sup> , Zn <sup>2+</sup> , Mg <sup>2+</sup> , Ca <sup>2+</sup> , Co <sup>2+</sup> , Cu <sup>2+</sup> , In <sup>3+</sup> , K <sup>+</sup> ) in the absence and presence of 1 equiv. Fe <sup>3+</sup> ( $\lambda_{\text{ex}} = 290 \text{ nm}$ )..... |  |
| <b>Fig. S13</b> UV-vis spectra of methanol solution containing different metal ions (10 <sup>-3</sup> M).....                                                                                                                                                                                                                                                                                                                                                     |  |

---

## Materials and general methods

All solvents and starting materials for synthesis were purchased commercially and were used as received. Powder X-ray diffraction (PXRD) patterns were collected with a Bruker AXS D8 advanced automated diffractometer with Cu-K radiation. All UV/Vis spectra were measured on a SP-752(PC) UV-Vis spectrophotometer (Shanghai Spectrum Instrument Co., Ltd). Luminescence spectra for the solid samples and liquid samples were investigated with a Hitachi F-4500 fluorescence spectrophotometer and Varian Cary Eclipse Fluorescence spectrophotometer, respectively. Inductively coupled plasma-optical emission spectroscopy (ICP) was performed using a 700 Series ICPOES (Agilent Technologies).

### Synthesis of **gea-MOF-1**

The crystal of **gea-MOF-1** was synthesized according to references.<sup>1</sup> A solution of  $Y(NO_3)_3 \cdot 6H_2O$  (8.6 mg, 0.0225 mmol),  $H_3BTB$  (6.6 mg, 0.015 mmol), 2-fluorobenzoic acid (95.2 mg, 0.675 mmol), DMF (2 ml) and  $H_2O$  (0.5 ml) was prepared in a 20 ml scintillation vial and subsequently heated to 378 K for 36 hours in a preheated oven.

### Experimental details for Organic dye selective adsorption and separation

Freshly prepared **gea-MOF-1** (20 mg) was immersed in 5 mL DMF solutions of different organic dyes with the concentrations of  $5 \times 10^{-5}$  M. The release experiment was carried out after the completion of an ion-exchange process of Methylene blue (MB) on **gea-MOF-1**. Then, the as prepared  $MB^+@gea-MOF-1$  was immersed in the saturated  $NaNO_3$  DMF solution with the same volume.

**Table S1** Molecular weight and dimensions of different dyes molecules.

---

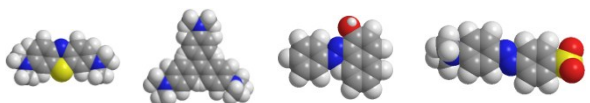

---

| Abbr            | $MB^+$ | $MV^+$ | $SD^0$ | $MO^-$ |
|-----------------|--------|--------|--------|--------|
| $M_w$           | 284.40 | 372.53 | 248.28 | 304.33 |
| $x(\text{\AA})$ | 4.00   | 4.00   | 3.68   | 5.31   |
| $y(\text{\AA})$ | 7.93   | 16.32  | 9.74   | 7.25   |
| $z(\text{\AA})$ | 16.34  | 14.15  | 13.55  | 17.39  |

---

**Table S2** The amounts of Y and Fe element in the sample of Fe<sup>3+</sup>@gea-MOF-1 after washing treatment.

| Sample                      | The mole ratio of Y: Fe |
|-----------------------------|-------------------------|
| Fe <sup>3+</sup> @gea-MOF-1 | 127: 1                  |

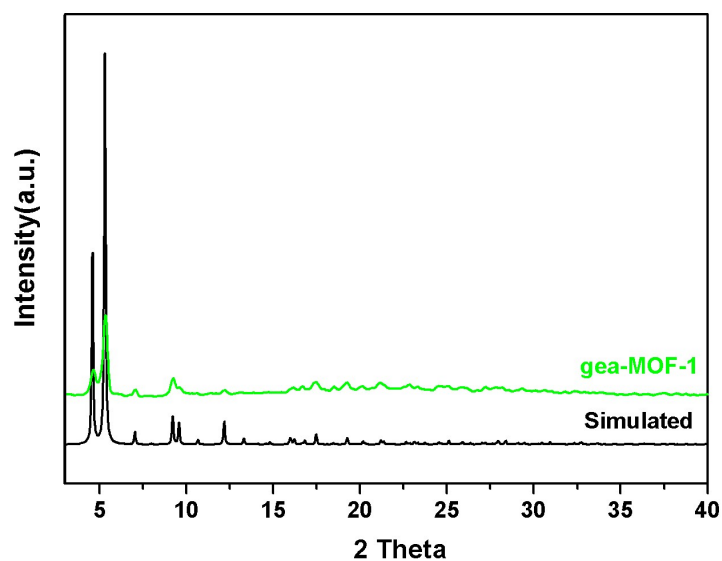

**Fig. S1** Simulated and experimental PXRD patterns for gea-MOF-1

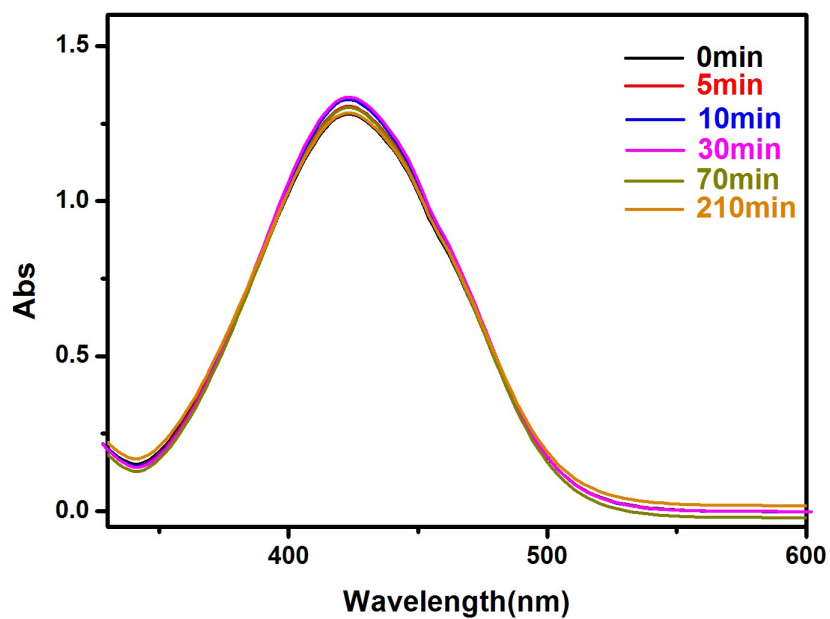

**Fig. S2** UV-vis spectra of DMF solutions of MO<sup>-</sup> in the presence of gea-MOF-1 monitored with time.

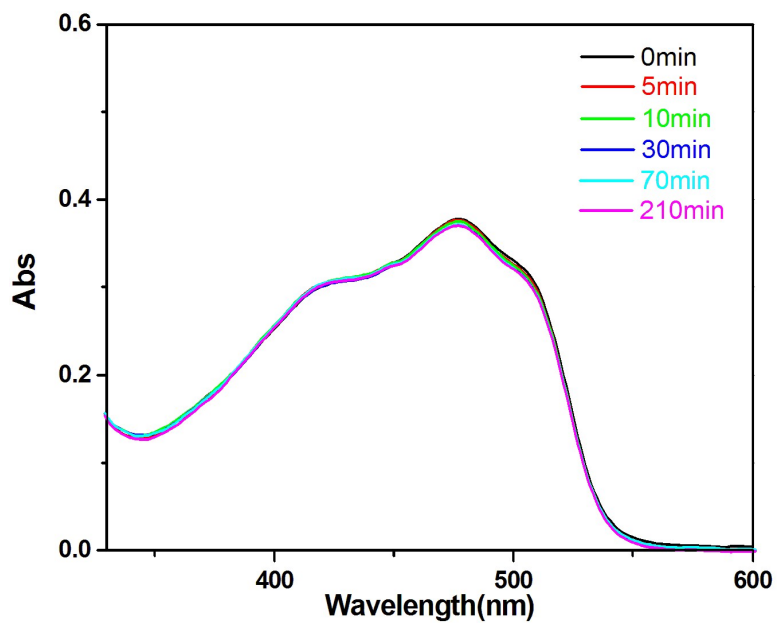

**Fig. S3** UV-vis spectra of DMF solutions of SD<sup>0</sup> in the presence of gea-MOF-1 monitored with time.

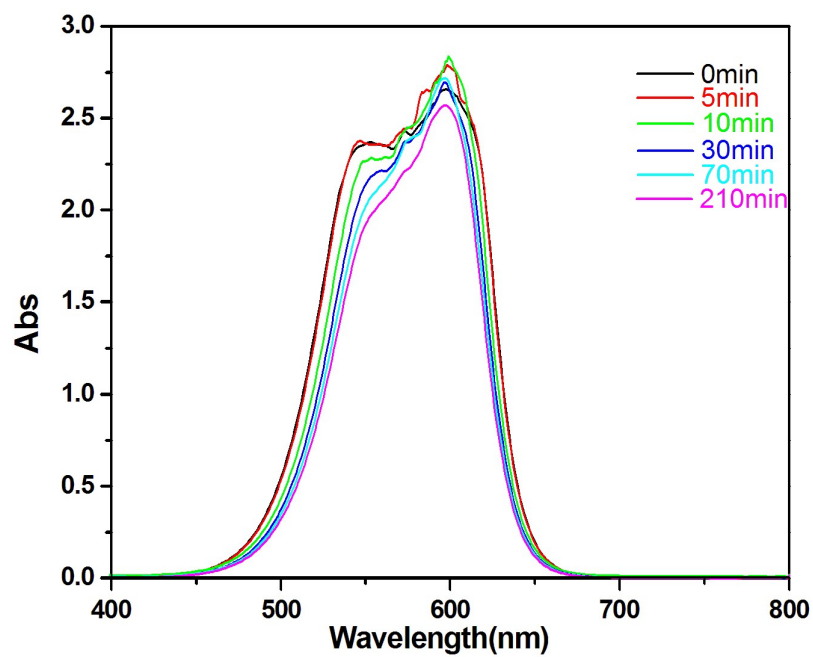

**Fig. S4** UV-vis spectra of DMF solutions of SD<sup>0</sup> in the presence of gea-MOF-1 monitored with time.

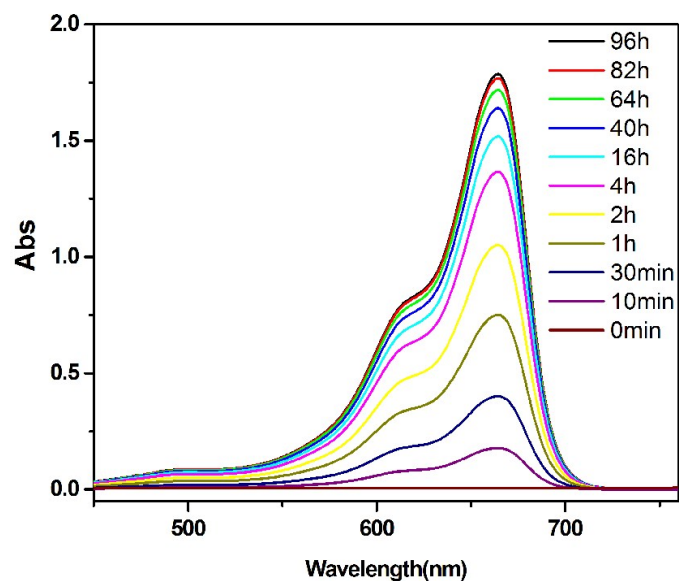

Fig. S5 Temporal evolution of UV-Vis absorption spectra of MB<sup>+</sup> released from MB<sup>+</sup>@gea-MOF-1 in NaNO<sub>3</sub>-containing DMF solution.

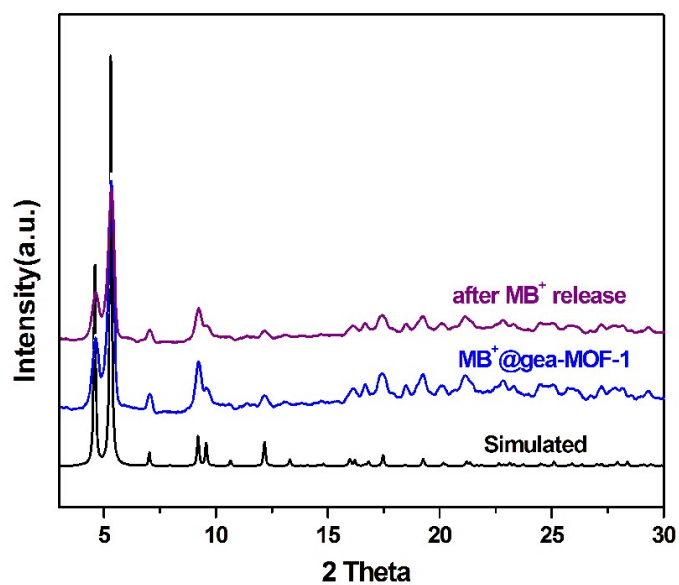

Fig. S6 PXRD patterns of gea-MOF-1 (black, simulated; blue, MB<sup>+</sup>@gea-MOF-1; violet, MB<sup>+</sup>@gea-MOF-1 after MB<sup>+</sup> release).

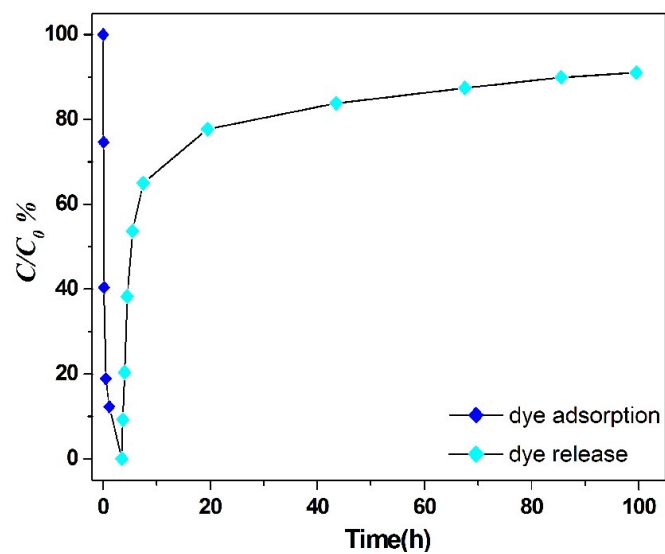

Fig. S7 The reversible adsorption and release of MB<sup>+</sup> in a full ion-exchange and release cycle.

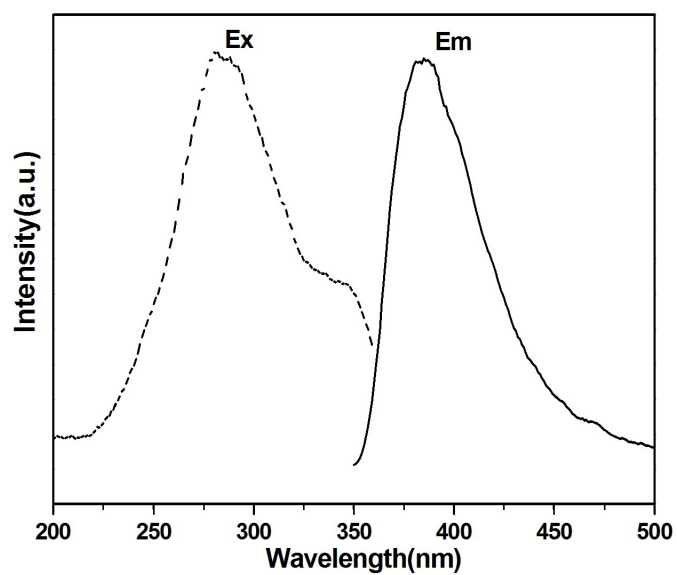

Fig. S8 Excitation (at 284 nm) and emission (at 385 nm) spectra of H<sub>3</sub>BTB in the solid state at room temperature.

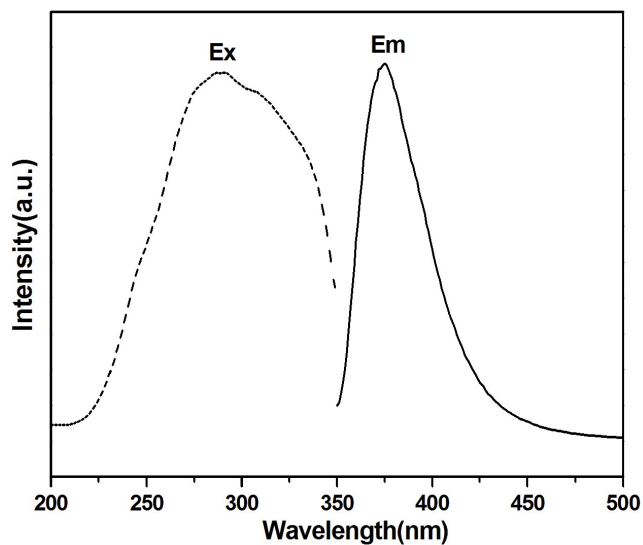

**Fig. S9** Excitation (at 290 nm) and emission (at 375 nm) spectra of gea-MOF-1 in the solid state at room temperature.

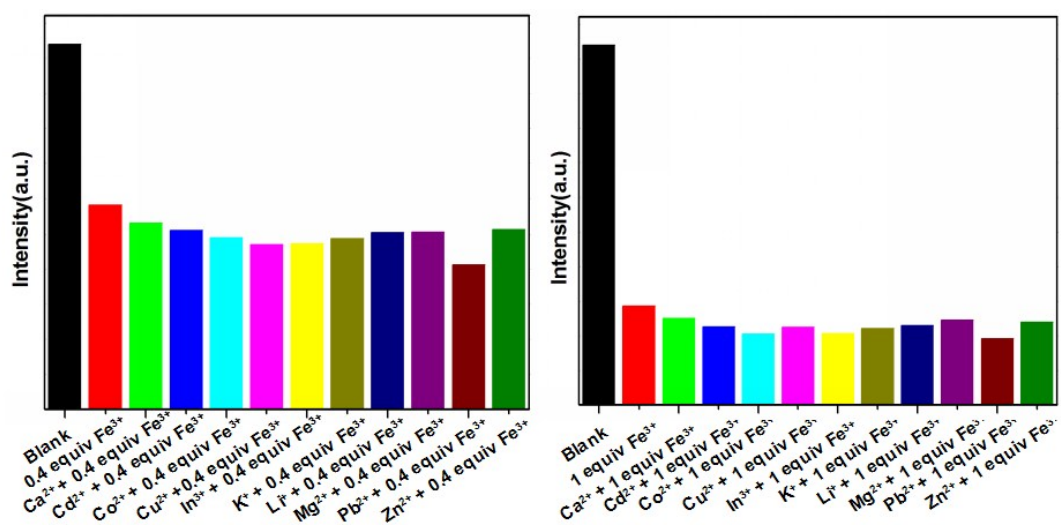

**Fig. S10** Room-temperature luminescent intensity of gea-MOF-1 upon addition of 0.5 equiv of  $\text{Fe}^{3+}$  and 0.4 equiv of various metal ions (a) and with adding 1 equiv of  $\text{Fe}^{3+}$  and 1 equiv of other metal ions (b) in methanol ( $\lambda_{\text{ex}} = 290 \text{ nm}$ ).

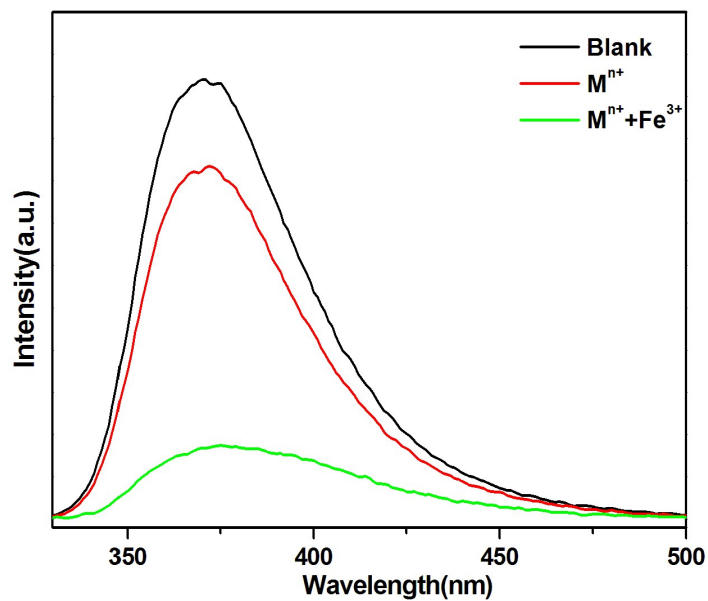

**Fig. S11** Comparison of the photoluminescence intensity of gea-MOF-1 in methanol suspension with the introduction of other  $M^{n+}$  ions ( $Li^+$ ,  $Cd^{2+}$ ,  $Pb^{2+}$ ,  $Zn^{2+}$ ,  $Mg^{2+}$ ,  $Ca^{2+}$ ,  $Co^{2+}$ ,  $Cu^{2+}$ ,  $In^{3+}$ ,  $K^+$ ) in the absence and presence of 1 equiv.  $Fe^{3+}$  ( $\lambda_{ex}=290$  nm).

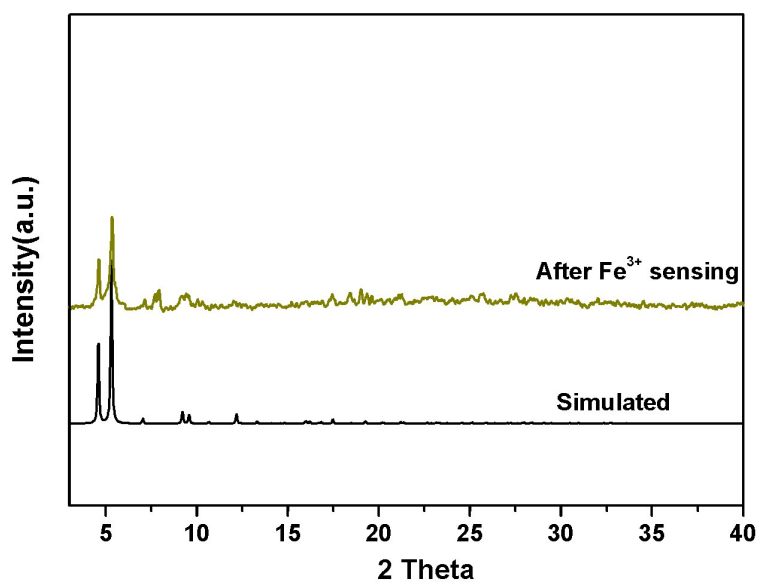

**Fig. S12** The PXRD data of the simulated and 1 after  $Fe^{3+}$  sensing process.



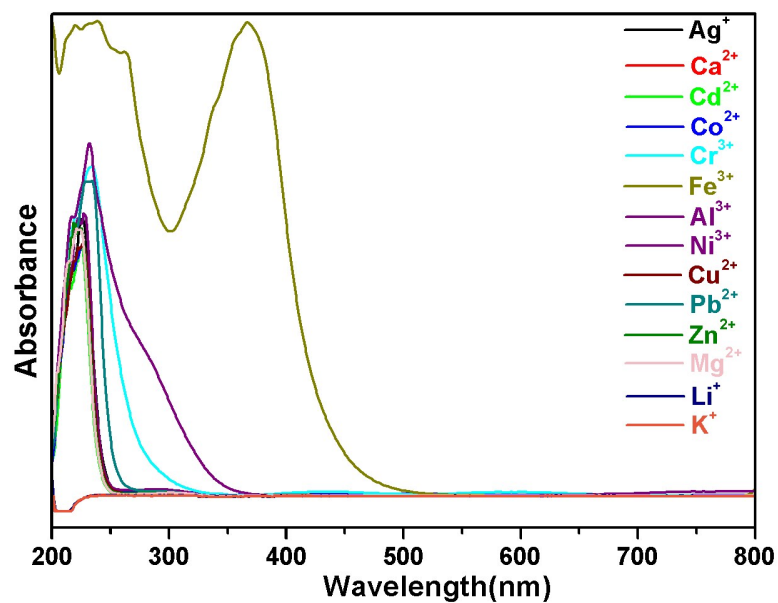

**Fig. S13** UV-vis spectra of methanol solution containing different metal ions ( $10^{-3}$  M).

**Reference:**

[1] V. Guillerm, Ł. J. Weseliński, Y. Belmabkhout, A. J. Cairns, V. D'Elia, Ł. Wojtas, K. Adil and M. Eddaoudi, *Nat. chem.*, 2014, **6**, 673-680.
